# Supplementary material for: Primary health care financing interventions: a systematic review and stakeholder-driven research agenda for the Asia-Pacific region
Source: PubMed Central journal article supplement — BMJ Glob Health. 2019 Aug 16;4(Suppl 8):e001481. doi: 10.1136/bmjgh-2019-001481 (PMC6703289; doi:10.1136/bmjgh-2019-001481), 2019-08-16
Supplement: bmjgh-2019-001481supp001.pdf [file bmjgh-2019-001481supp001.pdf]

## APPENDIX A – SEARCH STRATEGY

### Search terms (MEDLINE, Global health, Cochrane Database)

|    |                                                                                                                                                                                                                                                            |
|----|------------------------------------------------------------------------------------------------------------------------------------------------------------------------------------------------------------------------------------------------------------|
| 1. | Primary Health Care/ or “primary health care”.ti,ab. or “primary care”.ti,ab.                                                                                                                                                                              |
| 2. | Delivery of Health Care/ec or Financing, Personal/ec or Insurance, Health/ or Taxes/ or Universal Coverage/ec or Health Expenditures/ or Health Care Reform/ or Financial Support/ or Gift Giving/ or Economics, Medical/                                  |
| 3. | (health adj3 finance\$.ti,ab. or payment models.ti,ab. or paymen\$.ti,ab. or expenditur\$.ti,ab. or spending.ti,ab. or subsid\$.ti,ab. or subsidized.ti,ab. or out-of-pocket.ti,ab.                                                                        |
| 4. | cash transfer.ti,ab. or conditional cash transfer.ti,ab. or monetary incentive.ti,ab. or social protection.ti,ab. or safety nets.ti,ab. or (pay adj2 performance).ti,ab. or activity-based funding.ti,ab. or capitat\$.ti,ab. or (fee adj2 service).ti,ab. |
| 5. | (community adj3 health insurance).ti,ab. or microinsurance.ti,ab. or micro-insurance.ti,ab. or financial protection.ti,ab.                                                                                                                                 |
| 6. | 2 and 1                                                                                                                                                                                                                                                    |
| 7. | 3 and 1                                                                                                                                                                                                                                                    |
| 8. | 4 and 1                                                                                                                                                                                                                                                    |
| 9. | 5 and 1                                                                                                                                                                                                                                                    |

Additional filters applied include:

- only studies related to humans
- studies published since 1 January 2008 (i.e. the last 10 years), and
- studies from LMICs in the Asia-Pacific region.

“Asia-Pacific” will be defined as the countries within the South-East Asia and Western Pacific Regions of the World Health Organization. Filter below is adapted from the Cochrane EPOC LMIC Filters with World Bank Dec 2016 classifications.

|   |                                                                                                                                                                                                                                                                                                                                                                                                                                                                       |
|---|-----------------------------------------------------------------------------------------------------------------------------------------------------------------------------------------------------------------------------------------------------------------------------------------------------------------------------------------------------------------------------------------------------------------------------------------------------------------------|
| 1 | (Asia or Pacific).hw,kf,ti,ab,cp.                                                                                                                                                                                                                                                                                                                                                                                                                                     |
| 2 | ((low adj3 middle adj3 countr*).ti,ab. or (lmic or lmics or third world or lami countr*).ti,ab.)                                                                                                                                                                                                                                                                                                                                                                      |
| 3 | ((developing or less* developed or under developed or underdeveloped or middle income or low* income or underserved or under served or deprived or poor*) adj (countr* or nation? or population? or world)).ti,ab.                                                                                                                                                                                                                                                    |
| 4 | ((developing or less* developed or under developed or underdeveloped or middle income or low* income) adj (economy or economies)).ti,ab.                                                                                                                                                                                                                                                                                                                              |
| 5 | (Afghanistan or American Samoa or Bangladesh or Bhutan or Cambodia or China or Fiji or India or Indonesia or Kiribati or Korea or Lao PDR or Laos or Lao or Malaysia or Maldives or Marshall Islands or Micronesia or Mongolia or Myanmar or Nepal or Pakistan or Palau or Papua New Guinea or Philippines or Samoa or Solomon Islands or Sri Lanka or Thailand or Timor-Leste or East Timor or Timor Leste or Tonga or Tuvalu or Vanuatu or Vietnam).hw,kf,ti,ab,cp. |
| 6 | 2 or 3 or 4                                                                                                                                                                                                                                                                                                                                                                                                                                                           |
| 7 | 1 and 6                                                                                                                                                                                                                                                                                                                                                                                                                                                               |
| 8 | 5 or 7                                                                                                                                                                                                                                                                                                                                                                                                                                                                |
