# Supplementary material for: Primary health care financing interventions: a systematic review and stakeholder-driven research agenda for the Asia-Pacific region
Source: PubMed Central journal article supplement — BMJ Glob Health. 2019 Aug 16;4(Suppl 8):e001481. doi: 10.1136/bmjgh-2019-001481 (PMC6703289; doi:10.1136/bmjgh-2019-001481), 2019-08-16
Supplement: bmjgh-2019-001481supp003.pdf [file bmjgh-2019-001481supp003.pdf]

Table S2 – Grey literature studies of financing interventions included in systematic review

| Author, Year of Publication, Country | Financing intervention examined               | Method of study                                                                                                                                               | Population covered | Main Result                                                                                                                                                                                          | Incentive Provided?                                                                              | Equity considerations                                                                                          |
|--------------------------------------|-----------------------------------------------|---------------------------------------------------------------------------------------------------------------------------------------------------------------|--------------------|------------------------------------------------------------------------------------------------------------------------------------------------------------------------------------------------------|--------------------------------------------------------------------------------------------------|----------------------------------------------------------------------------------------------------------------|
| Achadi et al 2014, Indonesia         | Public insurance scheme for maternal services | Cross-sectional study of pre/post outcomes using qualitative and quantitative methods (including interviews, focus group discussions and a household survey). | Rural and urban.   | The study found that utilization of the scheme was highest among women who were least educated, poor, and resided in rural areas. Utilization was also high among women with delivery complications. | Staff involved in claims verification received incentives to accelerate the verification process | The program targets women not previously covered by existing social health insurance schemes                   |
| Barroy et al 2014, Vietnam           | Public insurance                              | A review of progress towards UHC, including successful strategies and remaining challenges.                                                                   | All                | A relatively high coverage rate (over 60%) has been achieved and substantial investments have been made to improve quality and equity yet OOP expenditures remain high.                              | NA                                                                                               | Subsidies to the insurance program are pro-poor but limited by ineffective risk pooling and capitation system. |

|                                              |                                                                                  |                                                                                                 |       |                                                                                                                                                                                                                                                                                                              |                                                                                    |                                                                                                                  |
|----------------------------------------------|----------------------------------------------------------------------------------|-------------------------------------------------------------------------------------------------|-------|--------------------------------------------------------------------------------------------------------------------------------------------------------------------------------------------------------------------------------------------------------------------------------------------------------------|------------------------------------------------------------------------------------|------------------------------------------------------------------------------------------------------------------|
| Berman et al 2010, India                     | A transfer program to increase public expenditure on health by state governments | Retrospective review and modelling of government allocation and expenditure data from 1990-2007 | Rural | Achieving increased expenditure targets is unlikely due to the fiscal implications of such large increases as well as the difficulties in actually spending rapidly increased budgets. To date, state governments have not been able to fully utilize additional funding provided by the central government. | NA                                                                                 | The transfer program is intended to improve access to effective health care for the poor residing in rural areas |
| Bredenkamp and Buisman 2015, The Philippines | Public insurance program                                                         | Longitudinal analysis of household survey data.                                                 | All   | Health spending increased by 150 percent from 2000 to 2012 and the incidence of catastrophic payments trebled since 2000. The percentage of people impoverished by health spending has also increased.                                                                                                       | Primary health providers receive incentives for completing patient health profiles | Coverage of the poor increased at a greater rate                                                                 |

|                                                        |                                       |                                                                                                 |       |                                                                                                                                                                                                                                                                             |    |                                                     |
|--------------------------------------------------------|---------------------------------------|-------------------------------------------------------------------------------------------------|-------|-----------------------------------------------------------------------------------------------------------------------------------------------------------------------------------------------------------------------------------------------------------------------------|----|-----------------------------------------------------|
| Cairns and Hou 2015, Papua New Guinea                  | Government funding of health services | Analysis of government health expenditure patterns to support rural frontline service provision | Rural | There is wide variability in cash disbursements from central government to different provinces with systemic delays. More certainty is needed for stable service provision as well as clarifying the role of the various levels of government and non-government providers. | NA | Variations in funding across provinces              |
| Honda et al 2016, China, Indonesia and the Philippines | Strategic purchasing models           | A review of purchasing mechanisms in 3 countries, including design and implementation gaps.     | All   | The study highlights common themes in relation to strategic purchasing across the 3 countries and provides recommendations to overcome barriers and areas for improvement                                                                                                   | NA | The equity of each purchasing mechanism is reviewed |

|                               |                                                                                  |                                                                                                                                                                                                                                                                                                                                    |       |                                                                                                                                                                                                                                                                                                                                                                                             |    |                                                                                                                  |
|-------------------------------|----------------------------------------------------------------------------------|------------------------------------------------------------------------------------------------------------------------------------------------------------------------------------------------------------------------------------------------------------------------------------------------------------------------------------|-------|---------------------------------------------------------------------------------------------------------------------------------------------------------------------------------------------------------------------------------------------------------------------------------------------------------------------------------------------------------------------------------------------|----|------------------------------------------------------------------------------------------------------------------|
| Rao and Choudhury 2012, India | A transfer program to increase public expenditure on health by state governments | Used data from 14 major states for the period 1991-92 to 2007-08 to estimate the effect of changes in states' per capita own revenues, unconditional central transfers, specific-purpose central transfers for the health sector, and changes in priorities of the states on the changes in states' per capita health expenditures | Rural | Increases in the central government grants for the health sector have not led to increases in the states' health expenditure. The objective of increasing the expenditures to 2 percent of GDP has not been fulfilled, partly because the low-income states could not avail the grants by making their own contributions and could not afford to pay for the current component of spending. | NA | The transfer program is intended to improve access to effective health care for the poor residing in rural areas |
|-------------------------------|----------------------------------------------------------------------------------|------------------------------------------------------------------------------------------------------------------------------------------------------------------------------------------------------------------------------------------------------------------------------------------------------------------------------------|-------|---------------------------------------------------------------------------------------------------------------------------------------------------------------------------------------------------------------------------------------------------------------------------------------------------------------------------------------------------------------------------------------------|----|------------------------------------------------------------------------------------------------------------------|

|                            |                    |                                                                                                                                                                                                                                                                                                                              |     |                                                                                                                                                                                                                                                                                       |    |    |
|----------------------------|--------------------|------------------------------------------------------------------------------------------------------------------------------------------------------------------------------------------------------------------------------------------------------------------------------------------------------------------------------|-----|---------------------------------------------------------------------------------------------------------------------------------------------------------------------------------------------------------------------------------------------------------------------------------------|----|----|
| Somanathan 2008, Indonesia | Subsidies for care | Used longitudinal survey data and a health care questionnaire to examine the impact of the Indonesian healthcard on health care use by children. Propensity score matching was used to control for systematic differences between treatment and control groups that could potentially bias the estimation of program effect. | All | Health care use declined for all children during the crisis years of 1997-2000 but the use of public sector outpatient services declined less for children with health-cards. The protective effect of the health-card on public sector use was concentrated among children aged 0-5. | NA | NA |
|----------------------------|--------------------|------------------------------------------------------------------------------------------------------------------------------------------------------------------------------------------------------------------------------------------------------------------------------------------------------------------------------|-----|---------------------------------------------------------------------------------------------------------------------------------------------------------------------------------------------------------------------------------------------------------------------------------------|----|----|

|                                  |                                   |                                                                                                                                                                                                                                                                                                                             |       |                                                                                                                                                                                                                                                                                      |                                                                                           |                                                                                                                                                                                                                                     |
|----------------------------------|-----------------------------------|-----------------------------------------------------------------------------------------------------------------------------------------------------------------------------------------------------------------------------------------------------------------------------------------------------------------------------|-------|--------------------------------------------------------------------------------------------------------------------------------------------------------------------------------------------------------------------------------------------------------------------------------------|-------------------------------------------------------------------------------------------|-------------------------------------------------------------------------------------------------------------------------------------------------------------------------------------------------------------------------------------|
| Sun et al<br>2014, China         | Provider<br>payment<br>mechanisms | Health centres<br>in two counties<br>were assigned<br>almost<br>randomly to<br>two groups: (1)<br>capitation or<br>(2) capitation +<br>P4P.<br>Outcomes<br>included<br>appropriate<br>prescribing<br>and<br>prescription<br>cost. Impacts<br>were assessed<br>via multivariate<br>differences-in-<br>differences<br>method. | Rural | P4P reduced<br>inappropriate<br>prescribing<br>significantly in<br>one county but<br>end-line rates<br>were still quite<br>high. P4P had no<br>effects on cost<br>per visit                                                                                                          | NA                                                                                        | Both groups<br>had 20% of the<br>capitated<br>budget withheld<br>but Group 2<br>received the<br>20% during<br>each quarter<br>following a<br>quality review.<br>Group 1 did not<br>receive the<br>20% until the<br>end of the year. |
| Tanner et al<br>2015, Lao<br>PDR | Conditional<br>cash<br>transfers  | Unmatched<br>and matched<br>difference in<br>differences<br>impact<br>evaluation to<br>investigate<br>whether the<br>intervention<br>expanded<br>coverage and<br>changed<br>health-seeking<br>behaviours                                                                                                                    | All   | The intervention<br>had little effect on<br>indicators pre-<br>specified by the<br>project. The<br>evaluation finds<br>an attributable<br>effect on only one<br>of the six formal<br>project indicators:<br>children in<br>intervention areas<br>were more likely<br>to receive full | Public<br>health<br>centres<br>were given<br>incentives<br>to provide<br>more<br>services | Despite limited<br>effects of the<br>intervention,<br>the evaluation<br>showed<br>improvements<br>for the poorest<br>40% of the<br>population.                                                                                      |

|  |  |                                                                    |  |                                                    |  |  |
|--|--|--------------------------------------------------------------------|--|----------------------------------------------------|--|--|
|  |  | among mothers who were pregnant or had a child under two years old |  | diphtheria, pertussis, and tetanus (DPT) vaccines. |  |  |
|--|--|--------------------------------------------------------------------|--|----------------------------------------------------|--|--|
